# Supplementary material for: Endocytosis-Mediated Replenishment of Amino Acids Favors Cancer Cell Proliferation and Survival in Chromophobe Renal Cell Carcinoma
Source: Oxford University Press journal article supplement (doi:10.1158/0008-5472.can-20-1998), 2020-10-28
Supplement: 00085472can201998-sup-245128_2_supp_6648153_qc71pb.docx [file 00085472can201998-sup-245128_2_supp_6648153_qc71pb.docx]

**Captions of supplementary movie and tables**

**Movie S1.** Live-cell fluorescence imaging showed that the DQ-Red BSA accumulated in UOK276 cells over time, providing evidence that macropinocytosis is an established process in chRCC cells to uptake macromolecules as nutrient source.

**Table S1.** Proteome profiling and a subsequent GSEA analysis of UOK276 cells supplemented with 1% amino acids in the presence or absence of 2.5% BSA versus a complete medium.

**Table S2.** Somatic nonsynonymous SNV and indels identified in our corhort.
